# Supplementary material for: Copper and Zinc Levels in Commercial Marine Fish from Setiu, East Coast of Peninsular Malaysia
Source: MDPI journal article supplement (doi:10.3390/toxics10020052), 2022-01-24
Supplement: s1 [file s1]

# Supplementary Materials: Copper and Zinc Levels in Commercial Marine Fish from Setiu, East Coast of Peninsular Malaysia

Chee Kong Yap and Khalid Awadh Al-Mutairi

**Table S1.** Description of the studied marine fishes, biometric features, water contents, and conversion factors.

| Niche habitat          | Site | Common name                    | Scientific name                | N | Range of weight (g) | Range of length (cm) | Water content (%) | Conversion factor |
|------------------------|------|--------------------------------|--------------------------------|---|---------------------|----------------------|-------------------|-------------------|
| Family: Carangidae     |      |                                |                                |   |                     |                      |                   |                   |
| Reef-associated        | 1    | Malabar trevally               | <i>Carangoides malabaricus</i> | 5 | 31–50               | 12.5–14.5            | 76                | 0.24              |
| Reef-associated        | 1    | Yellowtail scad                | <i>Atule mate</i>              | 5 | 47–60               | 16.0–17.5            | 77                | 0.23              |
| Reef-associated        | 1    | Shortfin scad                  | <i>Decapterus macrosoma</i>    | 5 | 51–73               | 16.5–19.0            | 80                | 0.20              |
| Reef-associated        | 1    | Yellowstripe scad              | <i>Selaroides leptolepis</i>   | 5 | 30–45               | 14.5–15.5            | 76                | 0.24              |
| Reef-associated        | 1    | Torpedo scad                   | <i>Megalaspis cordyla</i>      | 5 | 105–148             | 21.5–23.0            | 77                | 0.23              |
| Reef-associated        | 1    | Indian threadfish              | <i>Alectis indica</i>          | 3 | 49–58               | 15.0–15.5            | 79                | 0.21              |
| Family: Sciaenidae     |      |                                |                                |   |                     |                      |                   |                   |
| Benthopelagic          | 2    | Tigertooth croaker             | <i>Otolithes ruber</i>         | 3 | 130–139             | 23.0–23.5            | 76                | 0.24              |
| Demersal               | 2    | Goatee croaker                 | <i>Dendrophysa russelli</i>    | 5 | 85–96               | 19.0–20.0            | 77                | 0.23              |
| Demersal               | 2    | Belanger's croaker             | <i>Johnius belangerii</i>      | 3 | 62–74               | 16.0–17.5            | 77                | 0.23              |
| Family: Stromateidae   |      |                                |                                |   |                     |                      |                   |                   |
| Benthopelagic          | 1    | Chinese silver pomfret         | <i>Pampus chinensis</i>        | 3 | 138–149             | 18.0–18.5            | 81                | 0.19              |
| Family: Clupeidae      |      |                                |                                |   |                     |                      |                   |                   |
| Pelagic-neritic        | 1    | Chacunda gizzard shard         | <i>Anodontostoma chacunda</i>  | 5 | 46–53               | 14.5–16.0            | 77                | 0.23              |
| Family: Chirocentridae |      |                                |                                |   |                     |                      |                   |                   |
| Reef-associated        | 1    | Dorab wolf-herring             | <i>Chirocentrus dorab</i>      | 5 | 120–148             | 32.0–34.5            | 77                | 0.23              |
| Family: Scrombidae     |      |                                |                                |   |                     |                      |                   |                   |
| Pelagic                | 1    | Indian mackerel                | <i>Rastrelliger kanagurta</i>  | 5 | 58–86               | 17.0–18.5            | 74                | 0.26              |
| Pelagic-neritic        | 1    | Narrow-barred Spanish mackerel | <i>Scomberomorus commerson</i> | 3 | 325–335             | 36.0–37.0            | 77                | 0.23              |
| Family: Dasyatidae     |      |                                |                                |   |                     |                      |                   |                   |
| Demersal               | 1    | Dwarf whipray                  | <i>Himantura walga</i>         | 3 | 124–186             | 17.0–18.0            | 79                | 0.21              |
| Family: Nemipteridae   |      |                                |                                |   |                     |                      |                   |                   |
| Demersal               | 1    | Ornate threadfin bream         | <i>Nemipterus hexodon</i>      | 5 | 66–112              | 16.0–20.0            | 80                | 0.20              |
| Family: Lactariidae    |      |                                |                                |   |                     |                      |                   |                   |
| Pelagic-neritic        | 1    | False trevally                 | <i>Lactarius lactarius</i>     | 5 | 47–61               | 15.5–17.0            | 79                | 0.21              |
| Family: Trichiuridae   |      |                                |                                |   |                     |                      |                   |                   |
| Benthopelagic          | 1    | Largehead hairtail             | <i>Trichiurus lepturus</i>     | 3 | 128–150             | 43.0–46.0            | 78                | 0.22              |
| Family: Ariidae        |      |                                |                                |   |                     |                      |                   |                   |
| Demersal               | 1    | Spotted catfish                | <i>Arius maculatus</i>         | 3 | 70–130              | 18.5–23.0            | 77                | 0.23              |

**Table S2.** Comparisons of mean Cu concentrations (mg/kg dry weight (DW) and wet weight (WW)) between the present study and reported studies (15 species) of marine fishes in literature.

| No | Species                        | Location                                       | DW         | WW     | References                     |
|----|--------------------------------|------------------------------------------------|------------|--------|--------------------------------|
| 1. | <i>Carangoides malabaricus</i> | Setiu                                          | 2.61       | 0.63   | This study                     |
|    |                                | Andaman Sea                                    | 0.36       | 0.09   | Kureishy <i>et al.</i> [1]     |
| 2  | <i>Atule mate</i>              | Setiu                                          | 7.83       | 1.80   | This study                     |
|    |                                | Kuala Terengganu                               | 3.32–6.67  | 1.53** | Ong <i>et al.</i> [2]          |
|    |                                | Marine fish Peninsular Malaysia                | -          | 0.92*  | Wan Azmi <i>et al.</i> [3]     |
| 3  | <i>Decapterus macrosoma</i>    | Setiu                                          | 7.12       | 1.42   | This study                     |
|    |                                | Langkawi                                       | 3.48       | 0.70   | Agusa <i>et al.</i> [4]        |
|    |                                | Kuala Terengganu                               | 2.82–55.99 | 11.2** | Ong <i>et al.</i> [2]          |
|    |                                | Marine fish Peninsular Malaysia                | -          | 0.88*  | Wan Azmi <i>et al.</i> [3]     |
|    |                                | Gulf of Aqaba, Red Sea, Jordan                 | 6.11       | 1.22   | Khalaf <i>et al.</i> [5]       |
| 4  | <i>Selaroides leptolepis</i>   | Setiu                                          | 3.71       | 0.89   | This study                     |
|    |                                | Marine fish Peninsular Malaysia                | -          | 0.50*  | Wan Azmi <i>et al.</i> [3]     |
|    |                                | Port Dickson                                   | 2.46       | 0.59   | Praveena and Lin [6]           |
|    |                                | Pahang coastal waters                          | 2.10       | 0.50   | Kamaruzzaman and Wong [7]      |
|    |                                | West coast of Peninsular Malaysia              | -          | 1.41*  | Nurnadia <i>et al.</i> [8]     |
|    |                                |                                                |            |        |                                |
| 5  | <i>Megalaspis cordyla</i>      | Setiu                                          | 4.47       | 1.03   | This study                     |
|    |                                | Langkawi                                       | 2.21       | 0.51   | Agusa <i>et al.</i> [4]        |
|    |                                | Port Dickson                                   | 2.87       | 0.66   | Agusa <i>et al.</i> [4]        |
|    |                                | Cabang Tiga, Kelantan                          | 2.53       | 0.58   | Agusa <i>et al.</i> [4]        |
|    |                                | Sihanouk Ville, Cambodia                       | 2.48       | 0.57   | Agusa <i>et al.</i> [4]        |
|    |                                | Trat, Thailand                                 | 2.67       | 0.61   | Agusa <i>et al.</i> [9]        |
|    |                                | Prachuap Khiri Khan, Thailand                  | 2.96       | 0.68   | Agusa <i>et al.</i> [9]        |
|    |                                | Khlong Yai, Thailand                           | 4.06       | 0.93   | Agusa <i>et al.</i> [9]        |
|    |                                | Krabi, Thailand                                | 3.57       | 0.82   | Agusa <i>et al.</i> [9]        |
|    |                                | Trang, Thailand                                | 2.81       | 0.65   | Agusa <i>et al.</i> [9]        |
|    |                                | Smaut Sakrorn-1                                | 4.39       | 1.01   | Agusa <i>et al.</i> [9]        |
|    |                                | Smaut Sakrorn-2                                | 3.60       | 0.83   | Agusa <i>et al.</i> [9]        |
|    |                                | Kuala Kedah                                    | 3.36       | 0.77   | Salam <i>et al.</i> [10]       |
|    |                                | Tanjung Sepat, Selangor                        | 25.69      | 5.91   | Salam <i>et al.</i> [10]       |
|    |                                | Marine fish Peninsular Malaysia                | -          | 1.61*  | Wan Azmi <i>et al.</i> [3]     |
|    |                                | Port Dickson                                   | 1.40       | 0.32   | Praveena and Lin [6]           |
|    |                                | Pahang coastal waters                          | 3.10       | 0.71   | Kamaruzzaman and Ong [7]       |
|    |                                | Mersing                                        | 1.51       | 0.35   | Fathi <i>et al.</i> [11]       |
|    |                                | Cochin coast, India                            | 1.43       | 0.33   | Nair <i>et al.</i> [12]        |
|    |                                | West coast of Peninsular Malaysia              | -          | 1.56*  | Nurnadia <i>et al.</i> [8]     |
| 6  | <i>Otolithes ruber</i>         | Setiu                                          | 3.76       | 0.90   | This study                     |
|    |                                | Khlong Yai, Thailand                           | 1.94       | 0.47   | Agusa <i>et al.</i> [9]        |
|    |                                | Miri                                           | 12.4       | 2.98   | Anandkumar <i>et al.</i> [13]  |
|    |                                | Chabahar Bay, Makoran, Iran                    | 2.40       | 0.58   | Agah [14]                      |
|    |                                | Marine fish Peninsular Malaysia                | -          | 0.29*  | Wan Azmi <i>et al.</i> [3]     |
|    |                                | North of Persian Gulf                          | 8.46       | 2.03   | Niri <i>et al.</i> [15]        |
|    |                                | Kuala Tanjung coast, North Sumatra             | -          | 0.19*  | Simanjuntak <i>et al.</i> [16] |
|    |                                | Northwest coastal Karachi, Pakistan            | -          | 0.36*  | Raza <i>et al.</i> [17]        |
|    |                                | Khuzestan shore, northwest of the Persian Gulf | 4.09       | 0.98   | Hosseini <i>et al.</i> [18]    |
|    |                                | Kharg Island, Persian Gulf                     | -          | 0.98*  | Abadi <i>et al.</i> [19]       |
| 7  | <i>Dendrophysa russelli</i>    | Setiu                                          | 1.50       | 0.35   | This study                     |
|    |                                | Mumbai Harbor, India                           | 1.65       | 0.38   | Velusamy <i>et al.</i> [20]    |
| 8  | <i>Johnius belangeri</i>       | Setiu                                          | 2.25       | 0.52   | This study                     |
|    |                                | Kapar                                          | 0.66       | 0.15   | Bashir <i>et al.</i> [21]      |
|    |                                | Mersing                                        | 0.95       | 0.22   | Bashir <i>et al.</i> [21]      |
|    |                                | Blanakan River Estuary, Indonesia              | 3.00       | 0.69   | Takarina <i>et al.</i> [22]    |

|    |                                |                                                         |           |        |                                       |
|----|--------------------------------|---------------------------------------------------------|-----------|--------|---------------------------------------|
|    |                                | Kuala Tanjung coast, North Sumatra                      | -         | 0.11*  | Simanjuntak <i>et al.</i> [16]        |
|    |                                | Musa estuary, Iran                                      | 1.56      | 0.36   | Abdollahpur Monikh <i>et al.</i> [23] |
|    |                                | Daya Bay's Fishery Resource Reserve, South China Sea    | -         | 0.07*  | Gu <i>et al.</i> [24]                 |
| 9  | <i>Pampus chinensis</i>        | Setiu                                                   | 1.50      | 0.29   | This study                            |
|    |                                | Karachi Fish Harbour, Pakistan                          | 1.05      | 0.20   | Ahmed and Bat [25]                    |
|    |                                | Cox's Bazar, Bangladesh                                 | 0.20      | 0.04   | Rakib <i>et al.</i> [26]              |
|    |                                | Northwest coastal Karachi, Pakistan                     | -         | 0.30*  | Raza <i>et al.</i> [17]               |
|    |                                | Karnaphuli River estuary, Bangladesh                    | 12.1      | 2.30   | Ahmed <i>et al.</i> [27]              |
|    |                                | South-Eastern Part of Bangladesh                        | 16.2      | 3.08   | Tasnim <i>et al.</i> [28]             |
| 10 | <i>Anodontostoma chacunda</i>  | Setiu                                                   | 3.73      | 0.86   | This study                            |
|    |                                | Lada Bay, Panimbang, Indonesia                          | 1.74      | 0.40   | Agusa <i>et al.</i> [4]               |
|    |                                | Bondet, Cirebon, Indonesia                              | 1.47      | 0.34   | Agusa <i>et al.</i> [9]               |
|    |                                | Mengabang Telipot River, Kuala Terengganu               | 7.00      | 1.61   | Kamaruzzaman <i>et al.</i> [29]       |
|    |                                | Arabian Sea coasts of Pakistan                          | 0.22–7.96 | 1.83** | Ahmed <i>et al.</i> [30]              |
| 11 | <i>Chirocentrus dorab</i>      | Setiu                                                   | 2.25      | 0.52   | This study                            |
|    |                                | Cochin coast, India                                     | 1.51      | 0.35   | Nair <i>et al.</i> [12]               |
|    |                                | Palk Bay, Southeastern India                            | -         | 1.14*  | Arulkumar <i>et al.</i> [31]          |
|    |                                | West coast of Peninsular Malaysia                       | -         | 0.99*  | Nurnadia <i>et al.</i> [8]            |
| 12 | <i>Rastrelliger kanagurta</i>  | Setiu                                                   | 5.56      | 1.45   | This study                            |
|    |                                | Mersing                                                 | 1.94      | 0.50   | Agusa <i>et al.</i> [4]               |
|    |                                | Lada Bay, Panimbang, Indonesia                          | 1.09      | 0.28   | Agusa <i>et al.</i> [4]               |
|    |                                | Song Khla, Thailand                                     | 2.69      | 0.70   | Agusa <i>et al.</i> [9]               |
|    |                                | Ranong, Thailand                                        | 1.64      | 0.43   | Agusa <i>et al.</i> [9]               |
|    |                                | Saint Martin Island, Bangladesh                         | 2.23      | 0.58   | Baki <i>et al.</i> [32]               |
|    |                                | Andaman Sea                                             | -         | 0.96*  | Kureishy <i>et al.</i> [1]            |
|    |                                | Marine fish Peninsular Malaysia                         | -         | 0.97*  | Wan Azmi <i>et al.</i> [3]            |
|    |                                | Port Dickson                                            | 2.15      | 0.56   | Praveena and Lin [6]                  |
|    |                                | Pahang coastal waters                                   | 2.00      | 0.52   | Kamaruzzaman <i>et al.</i> [7]        |
|    |                                | Cochin coast, India                                     | 2.10      | 0.55   | Nair <i>et al.</i> [12]               |
|    |                                | Palk Bay, Southeastern India                            | -         | 1.30*  | Arulkumar <i>et al.</i> [31]          |
|    |                                | Coastal waters off Kochi, India                         | 2.75      | 0.72   | Rejomon <i>et al.</i> [33]            |
|    |                                | Langkawi Island                                         | 12.78     | 3.30   | Irwandi and Farida [34]               |
|    |                                | West coast of Peninsular Malaysia                       | -         | 0.89*  | Nurnadia <i>et al.</i> [8]            |
|    |                                | Kunduchi fish market in Dar es Salaam, Tanzania         | 9.17      | 2.38   | Mziray and Kimirei [35]               |
| 13 | <i>Scomberomorus commerson</i> | Setiu                                                   | 1.86      | 0.43   | This study                            |
|    |                                | Koh Kong, Cambodia                                      | 1.33      | 0.31   | Agusa <i>et al.</i> [4]               |
|    |                                | Marine fish Peninsular Malaysia                         | -         | 0.30*  | Wan Azmi <i>et al.</i> [3]            |
|    |                                | Langkawi Island                                         | 12.6      | 2.90   | Irwandi and Farida [34]               |
|    |                                | Coast of Karachi, Pakistan                              | 5.52      | 1.27   | Ahmed <i>et al.</i> [36]              |
|    |                                | Zhongsha (Macclesfield) Fishing Ground, South China Sea | -         | 0.37*  | Gu <i>et al.</i> [37]                 |
| 14 | <i>Trichiurus lepturus</i>     | Setiu                                                   | 2.99      | 0.66   | This study                            |
|    |                                | Miri                                                    | 9.00      | 1.98   | Anandkumar <i>et al.</i> [13]         |
|    |                                | Kutubdia Island, The Bay of Bengal                      | 2.14–2.84 | 0.62** | Safiur Rahman <i>et al.</i> [38]      |
|    |                                | Mumbai Harbor, India                                    | 2.11      | 0.46   | Velusamy <i>et al.</i> [20]           |
| 15 | <i>Arius maculatus</i>         | Setiu                                                   | 3.38      | 0.78   | This study                            |
|    |                                | Mumbai Harbor, India                                    | 1.75      | 0.40   | Velusamy <i>et al.</i> [20]           |
| 16 | <i>Himantura walga</i>         | Setiu                                                   | 2.99      | 0.63   | This study                            |
| 17 | <i>Nemipterus hexodon</i>      | Setiu                                                   | 2.61      | 0.52   | This study                            |
| 18 | <i>Alectis indica</i>          | Setiu                                                   | 3.33      | 0.70   | This study                            |
| 19 | <i>Lactarius lactarius</i>     | Setiu                                                   | 2.22      | 0.47   | This study                            |

Note: The data cited from the literature were recalculated for EDI and THQ based on fish consumption rate (100 g/person/day) and body weight of 62 kg for the adult Malaysian population, according to Nurul Izzah *et al.* [39]. The data which were originally reported on a dry weight basis were all converted into a wet weight basis based on the conversion factor for each species from this study. \* data that were originally reported on a wet weight basis. \*\* The maximum value was selected for recalculation.

**Table S3.** Values of estimated daily intake (EDI), target hazard quotient (THQ), and estimated weekly intake (EWI) of Cu were calculated based on the present study and cited Cu data in the marine fishes from the literature.

| No | Species                        | Location                            | EDI   | THQ   | EWI    | References                     |
|----|--------------------------------|-------------------------------------|-------|-------|--------|--------------------------------|
| 1. | <i>Carangoides malabaricus</i> | Setiu                               | 1.01  | 0.025 | 7.07   | This study                     |
|    |                                | Andaman Sea                         | 0.14  | 0.003 | 0.98   | Kureishy <i>et al.</i> [1]     |
| 2  | <i>Atule mate</i>              | Setiu                               | 2.90  | 0.073 | 20.33  | This study                     |
|    |                                | Kuala Terengganu                    | 2.47  | 0.062 | 17.32  | Ong <i>et al.</i> [2]          |
|    |                                | Marine fish Peninsular Malaysia     | 1.49  | 0.037 | 10.43  | Wan Azmi <i>et al.</i> [3]     |
| 3  | <i>Decapterus macrosoma</i>    | Setiu                               | 2.30  | 0.057 | 16.08  | This study                     |
|    |                                | Langkawi                            | 1.12  | 0.028 | 7.86   | Agusa <i>et al.</i> [4]        |
|    |                                | Kuala Terengganu                    | 18.06 | 0.452 | 126.45 | Ong <i>et al.</i> [2]          |
|    |                                | Marine fish Peninsular Malaysia     | 1.41  | 0.035 | 9.90   | Wan Azmi <i>et al.</i> [3]     |
|    |                                | Gulf of Aqaba, Red Sea, Jordan      | 1.97  | 0.049 | 13.80  | Khalaf <i>et al.</i> [5]       |
| 4  | <i>Selaroides leptolepis</i>   | Setiu                               | 1.44  | 0.036 | 10.05  | This study                     |
|    |                                | Marine fish Peninsular Malaysia     | 0.81  | 0.020 | 5.65   | Wan Azmi <i>et al.</i> [3]     |
|    |                                | Port Dickson                        | 0.95  | 0.024 | 6.67   | Praveena and Lin [6]           |
|    |                                | Pahang coastal waters               | 0.81  | 0.020 | 5.69   | Kamaruzzaman <i>et al.</i> [7] |
|    |                                | West coast of Peninsular Malaysia   | 2.27  | 0.057 | 15.92  | Nurnadia <i>et al.</i> [8]     |
| 5  | <i>Megalaspis cordyla</i>      | Setiu                               | 1.66  | 0.041 | 11.61  | This study                     |
|    |                                | Langkawi                            | 0.82  | 0.020 | 5.74   | Agusa <i>et al.</i> [4]        |
|    |                                | Port Dickson                        | 1.06  | 0.027 | 7.45   | Agusa <i>et al.</i> [4]        |
|    |                                | Cabang Tiga, Kelantan               | 0.94  | 0.023 | 6.57   | Agusa <i>et al.</i> [4]        |
|    |                                | Sihanouk Ville, Cambodia            | 0.92  | 0.023 | 6.44   | Agusa <i>et al.</i> [4]        |
|    |                                | Trat, Thailand                      | 0.99  | 0.025 | 6.93   | Agusa <i>et al.</i> [9]        |
|    |                                | Prachuap Khiri Khan, Thailand       | 1.10  | 0.027 | 7.69   | Agusa <i>et al.</i> [9]        |
|    |                                | Khlung Yai, Thailand                | 1.51  | 0.038 | 10.54  | Agusa <i>et al.</i> [9]        |
|    |                                | Krabi, Thailand                     | 1.32  | 0.033 | 9.27   | Agusa <i>et al.</i> [9]        |
|    |                                | Trang, Thailand                     | 1.04  | 0.026 | 7.30   | Agusa <i>et al.</i> [9]        |
|    |                                | Smaut Sakrorn-1                     | 1.63  | 0.041 | 11.40  | Agusa <i>et al.</i> [9]        |
|    |                                | Smaut Sakrorn-2                     | 1.34  | 0.033 | 9.35   | Agusa <i>et al.</i> [9]        |
|    |                                | Kuala Kedah                         | 1.25  | 0.031 | 8.73   | Salam <i>et al.</i> [10]       |
|    |                                | Tanjung Sepat, Selangor             | 9.53  | 0.238 | 66.71  | Salam <i>et al.</i> [10]       |
|    |                                | Marine fish Peninsular Malaysia     | 2.60  | 0.065 | 18.22  | Wan Azmi <i>et al.</i> [3]     |
|    |                                | Port Dickson                        | 0.52  | 0.013 | 3.64   | Praveena and Lin [6]           |
|    |                                | Pahang coastal waters               | 1.15  | 0.029 | 8.05   | Kamaruzzaman <i>et al.</i> [7] |
|    |                                | Mersing                             | 0.56  | 0.014 | 3.92   | Fathi <i>et al.</i> [11]       |
|    |                                | Cochin coast, India                 | 0.53  | 0.013 | 3.71   | Nair <i>et al.</i> [12]        |
|    |                                | West coast of Peninsular Malaysia   | 2.52  | 0.063 | 17.61  | Nurnadia <i>et al.</i> [8]     |
| 6  | <i>Otolithes ruber</i>         | Setiu                               | 1.46  | 0.036 | 10.19  | This study                     |
|    |                                | Khlung Yai, Thailand                | 0.75  | 0.019 | 5.26   | Agusa <i>et al.</i> [9]        |
|    |                                | Miri                                | 4.80  | 0.120 | 33.60  | Anandkumar <i>et al.</i> [13]  |
|    |                                | Chabahar Bay, Makoran, Iran         | 0.93  | 0.023 | 6.50   | Agah [14]                      |
|    |                                | Marine fish Peninsular Malaysia     | 0.47  | 0.012 | 3.27   | Wan Azmi <i>et al.</i> [3]     |
|    |                                | North of Persian Gulf               | 3.27  | 0.082 | 22.92  | Niri <i>et al.</i> [15]        |
|    |                                | Kuala Tanjung coast, North Sumatra  | 0.31  | 0.008 | 2.17   | Simanjuntak <i>et al.</i> [16] |
|    |                                | Northwest coastal Karachi, Pakistan | 0.58  | 0.015 | 4.06   | Raza <i>et al.</i> [17]        |

|    |                                |                                                      |      |       |       |                                      |
|----|--------------------------------|------------------------------------------------------|------|-------|-------|--------------------------------------|
|    |                                | Khuzestan shore, northwest of the Persian Gulf.      | 1.58 | 0.040 | 11.08 | Hosseini <i>et al.</i> [18]          |
|    |                                | Kharg Island, Persian Gulf                           | 1.58 | 0.040 | 11.06 | Abadi <i>et al.</i> [19]             |
| 7  | <i>Dendrophysa russelli</i>    | Setiu                                                | 0.56 | 0.014 | 3.90  | This study                           |
|    |                                | Mumbai Harbor, India                                 | 0.61 | 0.015 | 4.28  | Velusamy <i>et al.</i> [20]          |
| 8  | <i>Johnius belangeri</i>       | Setiu                                                | 0.83 | 0.021 | 5.84  | This study                           |
|    |                                | Kapar                                                | 0.24 | 0.006 | 1.71  | Bashir <i>et al.</i> [21]            |
|    |                                | Mersing                                              | 0.35 | 0.009 | 2.47  | Bashir <i>et al.</i> [21]            |
|    |                                | Blanakan River Estuary, Indonesia                    | 1.11 | 0.028 | 7.79  | Takarina <i>et al.</i> [22]          |
|    |                                | Kuala Tanjung coast, North Sumatra                   | 0.18 | 0.004 | 1.24  | Simanjuntak <i>et al.</i> [16]       |
|    |                                | Musa estuary, Iran                                   | 0.58 | 0.014 | 4.05  | Abdolahpur Monikh <i>et al.</i> [23] |
|    |                                | Daya Bay's Fishery Resource Reserve, South China Sea | 0.11 | 0.003 | 0.79  | Gu <i>et al.</i> [24]                |
| 9  | <i>Pampus chinensis</i>        | Setiu                                                | 0.46 | 0.011 | 3.22  | This study                           |
|    |                                | Karachi Fish Harbour, Pakistan                       | 0.32 | 0.008 | 2.25  | Ahmed and Bat [36]                   |
|    |                                | Cox's Bazar, Bangladesh                              | 0.06 | 0.002 | 0.43  | Rakib <i>et al.</i> [26]             |
|    |                                | Northwest coastal Karachi, Pakistan                  | 0.48 | 0.012 | 3.39  | Raza <i>et al.</i> [17]              |
|    |                                | Karnaphuli River estuary, Bangladesh                 | 3.71 | 0.093 | 25.96 | Ahmed <i>et al.</i> [27]             |
|    |                                | South-Eastern Part of Bangladesh                     | 4.96 | 0.124 | 34.75 | Tasnim <i>et al.</i> [28]            |
| 10 | <i>Anodontostoma chacunda</i>  | Setiu                                                | 1.38 | 0.035 | 9.69  | This study                           |
|    |                                | Lada Bay, Panimbang, Indonesia                       | 0.65 | 0.016 | 4.52  | Agusa <i>et al.</i> [4]              |
|    |                                | Bondet, Cirebon, Indonesia                           | 0.55 | 0.014 | 3.82  | Agusa <i>et al.</i> [9]              |
|    |                                | Mengabang Telipot River, Kuala Terengganu            | 2.60 | 0.065 | 18.18 | Kamaruzzaman <i>et al.</i> [29]      |
|    |                                | Arabian Sea coasts of Pakistan                       | 2.95 | 0.074 | 20.67 | Ahmed <i>et al.</i> [30]             |
| 11 | <i>Chirocentrus dorab</i>      | Setiu                                                | 0.83 | 0.021 | 5.84  | This study                           |
|    |                                | Cochin coast, India                                  | 0.56 | 0.014 | 3.92  | Nair <i>et al.</i> [12]              |
|    |                                | Palk Bay, Southeastern India                         | 1.84 | 0.046 | 12.87 | Arulkumar <i>et al.</i> [31]         |
|    |                                | West coast of Peninsular Malaysia                    | 1.60 | 0.040 | 11.18 | Nurnadia <i>et al.</i> [8]           |
| 12 | <i>Rastrelliger kanagurta</i>  | Setiu                                                | 2.33 | 0.058 | 16.32 | This study                           |
|    |                                | Mersing (1998) (N = 5)                               | 0.81 | 0.020 | 5.69  | Agusa <i>et al.</i> [4]              |
|    |                                | Lada Bay, Panimbang, Indonesia                       | 0.46 | 0.011 | 3.20  | Agusa <i>et al.</i> [4]              |
|    |                                | Song Khla, Thailand                                  | 1.13 | 0.028 | 7.90  | Agusa <i>et al.</i> [9]              |
|    |                                | Ranong, Thailand                                     | 0.69 | 0.017 | 4.81  | Agusa <i>et al.</i> [9]              |
|    |                                | Saint Martin Island, Bangladesh                      | 0.94 | 0.023 | 6.55  | Baki <i>et al.</i> [32]              |
|    |                                | Andaman Sea                                          | 1.55 | 0.039 | 10.84 | Kureishy <i>et al.</i> [1]           |
|    |                                | Marine fish Peninsular Malaysia                      | 1.57 | 0.039 | 10.96 | Wan Azmi <i>et al.</i> [3]           |
|    |                                | Port Dickson                                         | 0.90 | 0.023 | 6.31  | Praveena and Lin [6]                 |
|    |                                | Pahang coastal waters                                | 0.84 | 0.021 | 5.87  | Kamaruzzaman <i>et al.</i> [7]       |
|    |                                | Cochin coast, India                                  | 0.88 | 0.022 | 6.16  | Nair <i>et al.</i> [12]              |
|    |                                | Palk Bay, Southeastern India                         | 2.10 | 0.052 | 14.68 | Arulkumar <i>et al.</i> [31]         |
|    |                                | Coastal waters off Kochi, India                      | 1.15 | 0.029 | 8.07  | Rejomon <i>et al.</i> [33]           |
|    |                                | Langkawi Island                                      | 5.32 | 0.133 | 37.22 | Irwandi and Farida [34]              |
|    |                                | West coast of Peninsular Malaysia                    | 1.44 | 0.036 | 10.05 | Nurnadia <i>et al.</i> [8]           |
|    |                                | Kunduchi fish market in Dar es Salaam, Tanzania      | 3.85 | 0.096 | 26.92 | Mziray and Kimirei [35]              |
| 13 | <i>Scomberomorus commerson</i> | Setiu                                                | 0.69 | 0.017 | 4.83  | This study                           |
|    |                                | Koh Kong, Cambodia                                   | 0.49 | 0.012 | 3.45  | Agusa <i>et al.</i> [4]              |
|    |                                | Marine fish Peninsular Malaysia                      | 0.49 | 0.012 | 3.40  | Wan Azmi <i>et al.</i> [3]           |

|    |                            |                                                         |      |       |       |                               |
|----|----------------------------|---------------------------------------------------------|------|-------|-------|-------------------------------|
|    |                            | Langkawi Island                                         | 4.67 | 0.117 | 32.72 | Irwindi and Farida [34]       |
|    |                            | Coast of Karachi, Pakistan                              | 2.05 | 0.051 | 14.33 | Ahmed <i>et al.</i> [36]      |
|    |                            | Zhongsha (Macclesfield) Fishing Ground, South China Sea | 0.60 | 0.015 | 4.18  | Gu <i>et al.</i> [37]         |
| 14 | <i>Trichiurus lepturus</i> | Setiu                                                   | 1.06 | 0.027 | 7.43  | This study                    |
|    |                            | Miri                                                    | 3.19 | 0.080 | 22.35 | Anandkumar <i>et al.</i> [13] |
|    |                            | Kutubdia Island, The Bay of Bengal                      | 1.01 | 0.025 | 7.05  | Rahman <i>et al.</i> [38]     |
|    |                            | Mumbai Harbor, India                                    | 0.75 | 0.019 | 5.24  | Velusamy <i>et al.</i> [20]   |
| 15 | <i>Arius maculatus</i>     | Setiu                                                   | 1.25 | 0.031 | 8.78  | This study                    |
|    |                            | Mumbai Harbor, India                                    | 0.65 | 0.016 | 4.54  | Velusamy <i>et al.</i> [20]   |
| 16 | <i>Himantura walga</i>     | Setiu                                                   | 1.01 | 0.025 | 7.09  | This study                    |
| 17 | <i>Nemipterus hexodon</i>  | Setiu                                                   | 0.84 | 0.021 | 5.89  | This study                    |
| 18 | <i>Alectis indica</i>      | Setiu                                                   | 1.13 | 0.028 | 7.90  | This study                    |
| 19 | <i>Lactarius lactarius</i> | Setiu                                                   | 0.75 | 0.019 | 5.26  | This study                    |

Note: PTWIs for a 62 kg adult is equivalent to 217 mg/week for Cu.

**Table S4.** Comparison of mean Zn concentrations (mg/kg dry weight (DW) and wet weight (WW)) in various species (15 species) of marine fishes reported in the literature.

| No | Species                        | Location                          | DW        | WW     | References                     |
|----|--------------------------------|-----------------------------------|-----------|--------|--------------------------------|
| 1. | <i>Carangoides malabaricus</i> | Setiu                             | 35.96     | 8.63   | This study                     |
|    |                                | Andaman Sea                       | -         | 4.74*  | Kureishy <i>et al.</i> [1]     |
| 2  | <i>Atule mate</i>              | Setiu                             | 61.17     | 14.07  | This study                     |
|    |                                | Kuala Terengganu                  | 14–29.2   | 6.72** | Ong <i>et al.</i> [2]          |
|    |                                | Marine fish Peninsular Malaysia   | -         | 8.49*  | Wan Azmi <i>et al.</i> [3]     |
| 3  | <i>Decapterus macrosoma</i>    | Setiu                             | 54.85     | 10.97  | This study                     |
|    |                                | Langkawi                          | 29.1      | 5.82   | Agusa <i>et al.</i> [4]        |
|    |                                | Kuala Terengganu                  | 10.4–42.3 | 8.46** | Ong <i>et al.</i> [2]          |
|    |                                | Marine fish Peninsular Malaysia   | -         | 15.90* | Wan Azmi <i>et al.</i> [3]     |
|    |                                | Gulf of Aqaba, Red Sea, Jordan    | 20.3      | 4.06   | Khalaf <i>et al.</i> [5]       |
| 4  | <i>Selaroides leptolepis</i>   | Setiu                             | 58.78     | 14.11  | This study                     |
|    |                                | Marine fish Peninsular Malaysia   | -         | 7.20*  | Wan Azmi <i>et al.</i> [3]     |
|    |                                | Pahang coastal waters             | 11.0      | 2.64   | Kamaruzzaman <i>et al.</i> [7] |
|    |                                | West coast of Peninsular Malaysia | -         | 4.49*  | Nurnadia <i>et al.</i> [8]     |
| 5  | <i>Megalaspis cordyla</i>      | Setiu                             | 45.74     | 10.52  | This study                     |
|    |                                | Langkawi                          | 17.9      | 4.12   | Agusa <i>et al.</i> [4]        |
|    |                                | Port Dickson                      | 27.2      | 6.26   | Agusa <i>et al.</i> [4]        |
|    |                                | Cabang Tiga, Kelantan             | 28.3      | 6.51   | Agusa <i>et al.</i> [4]        |
|    |                                | Sihanouk Ville, Cambodia          | 27.9      | 6.42   | Agusa <i>et al.</i> [9]        |
|    |                                | Trat, Thailand                    | 35.2      | 8.10   | Agusa <i>et al.</i> [9]        |
|    |                                | Prachuap Khiri Khan, Thailand     | 29.3      | 6.74   | Agusa <i>et al.</i> [9]        |
|    |                                | Khlung Yai, Thailand              | 23.6      | 5.43   | Agusa <i>et al.</i> [9]        |
|    |                                | Krabi, Thailand                   | 20.4      | 4.69   | Agusa <i>et al.</i> [9]        |
|    |                                | Trang, Thailand                   | 22.7      | 5.22   | Agusa <i>et al.</i> [9]        |
|    |                                | Smaut Sakrorn-1                   | 21.3      | 4.90   | Agusa <i>et al.</i> [9]        |
|    |                                | Smaut Sakrorn-2                   | 22.0      | 5.06   | Agusa <i>et al.</i> [9]        |
|    |                                | Marine fish Peninsular Malaysia   | -         | 7.00*  | Wan Azmi <i>et al.</i> [3]     |
|    |                                | Pahang coastal waters             | 10.0      | 2.30   | Kamaruzzaman <i>et al.</i> [7] |
|    |                                | Mersing                           | 21.1      | 4.85   | Fathi <i>et al.</i> [11]       |
|    |                                | Karachi Fish Harbor of Pakistan   | -         | 3.00   | Ahmed and Bat [40]             |
|    |                                | Cochin coast, India               | 19.3      | 4.44   | Nair <i>et al.</i> [12]        |

|    |                               |                                                       |            |        |                                 |
|----|-------------------------------|-------------------------------------------------------|------------|--------|---------------------------------|
|    |                               | West coast of Peninsular Malaysia                     | -          | 3.99*  | Nurnadia <i>et al.</i> [8]      |
| 6  | <i>Otolithes ruber</i>        | Setiu                                                 | 30.2       | 7.26   | This study                      |
|    |                               | Khlong Yai, Thailand                                  | 23.9       | 5.74   | Agusa <i>et al.</i> [9]         |
|    |                               | Miri                                                  | 16.9       | 4.06   | Anandkumar <i>et al.</i> [13]   |
|    |                               | Chabahar Bay, Makoran, Iran                           | 4.70       | 1.13   | Agah [14]                       |
|    |                               | Marine fish Peninsular Malaysia                       | -          | 4.34*  | Wan Azmi <i>et al.</i> [3]      |
|    |                               | The northern part of the Hormuz strait (Persian Gulf) | 23.3       | 5.58   | Janadeleh and Jahangiri [41]    |
|    |                               | Kuala Tanjung coast, North Sumatra                    | -          | 7.69*  | Simanjuntak <i>et al.</i> [16]  |
|    |                               | Southwest coast of Peninsular Malaysia                | 5.87       | 1.41   | Kamaruzzaman <i>et al.</i> [42] |
|    |                               | Kharg Island, Persian Gulf                            | -          | 7.04*  | Abadi <i>et al.</i> [19]        |
| 7  | <i>Dendrophysa russelli</i>   | Setiu                                                 | 41.96      | 9.65   | This study                      |
|    |                               | Mumbai Harbor, India                                  | 38.69      | 8.90   | Velusamy <i>et al.</i> [20]     |
| 8  | <i>Johnius belangeri</i>      | Setiu                                                 | 26.77      | 6.16   | This study                      |
|    |                               | Kapar                                                 | 18.27      | 4.20   | Bashir <i>et al.</i> [21]       |
|    |                               | Mersing                                               | 13.12      | 3.02   | Bashir <i>et al.</i> [21]       |
|    |                               | Blanakan River Estuary, Indonesia                     | 29.0       | 6.67   | Takarina <i>et al.</i> [22]     |
|    |                               | Daya Bay's Fishery Resource Reserve, South China Sea  | -          | 4.57*  | Gu <i>et al.</i> [24]           |
|    |                               | Kuala Tanjung coast, North Sumatra                    | -          | 7.23*  | Simanjuntak <i>et al.</i> [16]  |
| 9  | <i>Pampus chinensis</i>       | Setiu                                                 | 32.59      | 6.19   | This study                      |
|    |                               | Karachi Fish Harbour, Pakistan                        | -          | 1.67*  | Ahmed and Bat [36]              |
|    |                               | Kalimati fish market (Kathmandu)                      | 25.4       | 4.83   | Paudel <i>et al.</i> [43]       |
|    |                               | Cox's Bazar, Bangladesh                               | 68.7       | 13.05  | Rakib <i>et al.</i> [26]        |
|    |                               | South-Eastern Part of Bangladesh                      | 8.00       | 1.52   | Tasnim <i>et al.</i> [28]       |
| 10 | <i>Anodontostoma chacunda</i> | Setiu                                                 | 42.67      | 9.81   | This study                      |
|    |                               | Lada Bay, Panimbang, Indonesia                        | 28.0       | 6.44   | Agusa <i>et al.</i> [9]         |
|    |                               | Bondet, Cirebon, Indonesia                            | 27.1       | 6.23   | Agusa <i>et al.</i> [9]         |
|    |                               | Mengabang Telipot River, Kuala Terengganu             | 5.00       | 1.15   | Kamaruzzaman <i>et al.</i> [29] |
|    |                               | Arabian Sea coasts of Pakistan                        | 8.24–56.23 | 12.9** | Ahmed <i>et al.</i> [30]        |
| 11 | <i>Chirocentrus dorab</i>     | Setiu                                                 | 31.0       | 7.14   | This study                      |
|    |                               | Cochin coast, India                                   | 6.56       | 1.51   | Nair <i>et al.</i> [12]         |
|    |                               | Palk Bay, Southeastern India                          | 29.8       | 6.85   | Arulkumar <i>et al.</i> [31]    |
|    |                               | Southwest coast of Peninsular Malaysia                | 3.32       | 0.76   | Kamaruzzaman <i>et al.</i> [42] |
|    |                               | West coast of Peninsular Malaysia                     | -          | 3.40*  | Nurnadia <i>et al.</i> [8]      |
| 12 | <i>Rastrelliger kanagurta</i> | Setiu                                                 | 80.49      | 20.93  | This study                      |
|    |                               | Mersing                                               | 23.2       | 6.03   | Agusa <i>et al.</i> [4]         |
|    |                               | Lada Bay, Panimbang, Indonesia                        | 15.0       | 3.90   | Agusa <i>et al.</i> [9]         |
|    |                               | Song Khla, Thailand                                   | 50.7       | 13.18  | Agusa <i>et al.</i> [9]         |
|    |                               | Ranong, Thailand                                      | 21.1       | 5.49   | Agusa <i>et al.</i> [9]         |
|    |                               | Saint Martin Island, Bangladesh                       | 9.21       | 2.39   | Baki <i>et al.</i> [32]         |
|    |                               | Andaman Sea                                           | -          | 6.09*  | Kureishy <i>et al.</i> [1]      |
|    |                               | Marine fish Peninsular Malaysia                       | -          | 9.08*  | Wan Azmi <i>et al.</i> [3]      |
|    |                               | Pahang coastal waters                                 | 24.0       | 6.24   | Kamaruzzaman <i>et al.</i> [7]  |

|    |                                |                                                         |             |        |                               |
|----|--------------------------------|---------------------------------------------------------|-------------|--------|-------------------------------|
|    |                                | Cochin coast, India                                     | 15.0        | 3.90   | Nair <i>et al.</i> [12]       |
|    |                                | Palk Bay, Southeastern India                            | 29.3        | 7.62   | Arulkumar <i>et al.</i> [31]  |
|    |                                | Langkawi Island                                         | 38.9        | 10.13  | Irwandi and Farida [34]       |
|    |                                | West coast of Peninsular Malaysia                       | -           | 4.64   | Nurnadia <i>et al.</i> [8]    |
|    |                                | Coastal waters off Kochi, India                         | 37.4        | 9.72   | Rejomon <i>et al.</i> [33]    |
|    |                                | Kunduchi fish market in Dar es Salaam, Tanzania         | 104         | 27.0   | Mziray and Kimirei [35]       |
| 13 | <i>Scomberomorus commerson</i> | Setiu                                                   | 49.6        | 11.41  | This study                    |
|    |                                | Koh Kong, Cambodia                                      | 17.5        | 4.03   | Agusa <i>et al.</i> [9]       |
|    |                                | Marine fish Peninsular Malaysia                         | -           | 4.69*  | Wan Azmi <i>et al.</i> [3]    |
|    |                                | Langkawi Island                                         | 37.2        | 8.56   | Irwandi and Farida [34]       |
|    |                                | Coast of Karachi, Pakistan                              | 9.43        | 2.17   | Ahmed <i>et al.</i> [36]      |
|    |                                | Zhongsha (Macclesfield) Fishing Ground, South China Sea | -           | 4.24*  | Gu <i>et al.</i> [37]         |
| 14 | <i>Trichiurus lepturus</i>     | Setiu                                                   | 24.14       | 5.31   | This study                    |
|    |                                | Miri                                                    | 25.3        | 5.57   | Anandkumar <i>et al.</i> [13] |
|    |                                | Kutubdia Island, The Bay of Bengal                      | 23.04–27.34 | 6.01** | Rahman <i>et al.</i> [38]     |
|    |                                | Mumbai Harbor, India                                    | 42.34       | 9.31   | Velusamy <i>et al.</i> [20]   |
| 15 | <i>Arius maculatus</i>         | Setiu                                                   | 33.99       | 7.82   | This study                    |
|    |                                | Mumbai Harbor, India                                    | 55.3        | 12.72  | Velusamy <i>et al.</i> [20]   |
| 16 | <i>Himantura walga</i>         | Setiu                                                   | 28.11       | 5.90   | This study                    |
| 17 | <i>Nemipterus hexodon</i>      | Setiu                                                   | 26.45       | 5.29   | This study                    |
| 18 | <i>Alectis indica</i>          | Setiu                                                   | 27.89       | 5.86   | This study                    |
| 19 | <i>Lactarius lactarius</i>     | Setiu                                                   | 32.62       | 6.85   | This study                    |

Note: The data cited from the literature were recalculated for EDI and THQ based on fish consumption rate (100 g/person/day) and body weight of 62 kg for the adult Malaysian population, according to Nurul Izzah *et al.* [39]. The data which were originally reported on a dry weight basis were all converted into a wet weight basis based on the conversion factor for each species from this study. \* data that were originally reported on a wet weight basis. \*\* The maximum value was selected for recalculation.

**Table S5.** Values of estimated daily intake (EDI), target hazard quotient (THQ), and estimated weekly intake (EWI) of Zn were calculated based on the present study and cited Zn data in the marine fishes from the literature.

| No | Species                        | Location                          | EDI   | THQ   | EWI   | References                     |
|----|--------------------------------|-----------------------------------|-------|-------|-------|--------------------------------|
| 1. | <i>Carangoides malabaricus</i> | Setiu                             | 13.92 | 0.046 | 97.4  | This study                     |
|    |                                | Andaman Sea                       | 7.65  | 0.025 | 53.5  | Kureishy <i>et al.</i> [1]     |
| 2  | <i>Atule mate</i>              | Setiu                             | 22.69 | 0.076 | 158.8 | This study                     |
|    |                                | Kuala Terengganu                  | 10.83 | 0.036 | 75.8  | Ong <i>et al.</i> [2]          |
|    |                                | Marine fish Peninsular Malaysia   | 13.69 | 0.046 | 95.9  | Wan Azmi <i>et al.</i> [3]     |
| 3  | <i>Decapterus macrosoma</i>    | Setiu                             | 17.69 | 0.059 | 123.9 | This study                     |
|    |                                | Langkawi                          | 9.39  | 0.031 | 65.7  | Agusa <i>et al.</i> [4]        |
|    |                                | Kuala Terengganu                  | 13.65 | 0.045 | 95.5  | Ong <i>et al.</i> [2]          |
|    |                                | Marine fish Peninsular Malaysia   | 25.65 | 0.085 | 179.5 | Wan Azmi <i>et al.</i> [3]     |
|    |                                | Gulf of Aqaba, Red Sea, Jordan    | 6.55  | 0.022 | 45.8  | Khalaf <i>et al.</i> [5]       |
| 4  | <i>Selaroides leptolepis</i>   | Setiu                             | 22.75 | 0.076 | 159.3 | This study                     |
|    |                                | Marine fish Peninsular Malaysia   | 11.61 | 0.039 | 81.3  | Wan Azmi <i>et al.</i> [3]     |
|    |                                | Pahang coastal waters             | 4.26  | 0.014 | 29.8  | Kamaruzzaman <i>et al.</i> [7] |
|    |                                | West coast of Peninsular Malaysia | 7.24  | 0.024 | 50.7  | Nurnadia <i>et al.</i> [8]     |
| 5  | <i>Megalaspis cordyla</i>      | Setiu                             | 16.97 | 0.057 | 118.8 | This study                     |



|    |                               |                                                       |       |       |       |                                 |
|----|-------------------------------|-------------------------------------------------------|-------|-------|-------|---------------------------------|
|    |                               | Langkawi                                              | 6.64  | 0.022 | 46.5  | Agusa <i>et al.</i> [4]         |
|    |                               | Port Dickson                                          | 10.09 | 0.034 | 70.6  | Agusa <i>et al.</i> [4]         |
|    |                               | Cabang Tiga, Kelantan                                 | 10.50 | 0.035 | 73.5  | Agusa <i>et al.</i> [4]         |
|    |                               | Sihanouk Ville, Cambodia                              | 10.35 | 0.035 | 72.5  | Agusa <i>et al.</i> [9]         |
|    |                               | Trat, Thailand                                        | 13.06 | 0.044 | 91.4  | Agusa <i>et al.</i> [9]         |
|    |                               | Prachuap Khiri Khan, Thailand                         | 10.87 | 0.036 | 76.1  | Agusa <i>et al.</i> [9]         |
|    |                               | Khlong Yai, Thailand                                  | 8.75  | 0.029 | 61.3  | Agusa <i>et al.</i> [9]         |
|    |                               | Krabi, Thailand                                       | 7.57  | 0.025 | 53.0  | Agusa <i>et al.</i> [9]         |
|    |                               | Trang, Thailand                                       | 8.42  | 0.028 | 58.9  | Agusa <i>et al.</i> [9]         |
|    |                               | Smaut Sakrorn-1                                       | 7.90  | 0.026 | 55.3  | Agusa <i>et al.</i> [9]         |
|    |                               | Smaut Sakrorn-2                                       | 8.16  | 0.027 | 57.1  | Agusa <i>et al.</i> [9]         |
|    |                               | Marine fish Peninsular Malaysia                       | 11.29 | 0.038 | 79.0  | Wan Azmi <i>et al.</i> [3]      |
|    |                               | Pahang coastal waters                                 | 3.71  | 0.012 | 26.0  | Kamaruzzaman <i>et al.</i> [7]  |
|    |                               | Mersing                                               | 7.83  | 0.026 | 54.8  | Fathi <i>et al.</i> [11]        |
|    |                               | Karachi Fish Harbor of Pakistan                       | 4.84  | 0.016 | 33.9  | Ahmed and Bat [40]              |
|    |                               | Cochin coast, India                                   | 7.16  | 0.024 | 50.1  | Nair <i>et al.</i> [12]         |
|    |                               | West coast of Peninsular Malaysia                     | 6.44  | 0.021 | 45.0  | Nurnadia <i>et al.</i> [8]      |
| 6  | <i>Otolithes ruber</i>        | Setiu                                                 | 11.71 | 0.039 | 81.9  | This study                      |
|    |                               | Khlong Yai, Thailand                                  | 9.25  | 0.031 | 64.8  | Agusa <i>et al.</i> [9]         |
|    |                               | Miri                                                  | 6.54  | 0.022 | 45.8  | Anandkumar <i>et al.</i> [13]   |
|    |                               | Chabahar Bay, Makoran, Iran                           | 1.82  | 0.006 | 12.7  | Agah [14]                       |
|    |                               | Marine fish Peninsular Malaysia                       | 7.00  | 0.023 | 49.0  | Wan Azmi <i>et al.</i> [3]      |
|    |                               | The northern part of the Hormuz strait (Persian Gulf) | 9.00  | 0.030 | 63.0  | Janadeleh and Jahangiri [41]    |
|    |                               | Kuala Tanjung coast, North Sumatra                    | 12.40 | 0.041 | 86.8  | Simanjuntak <i>et al.</i> [16]  |
|    |                               | Southwest coast of Peninsular Malaysia                | 2.27  | 0.008 | 15.9  | Kamaruzzaman <i>et al.</i> [42] |
|    |                               | Kharg Island, Persian Gulf                            | 11.35 | 0.038 | 79.5  | Abadi <i>et al.</i> [19]        |
| 7  | <i>Dendrophysa russelli</i>   | Setiu                                                 | 15.57 | 0.052 | 109.0 | This study                      |
|    |                               | Mumbai Harbor, India                                  | 14.35 | 0.048 | 100.5 | Velusamy <i>et al.</i> [20]     |
| 8  | <i>Johnius belangeri</i>      | Setiu                                                 | 9.93  | 0.033 | 69.5  | This study                      |
|    |                               | Kapar                                                 | 6.78  | 0.023 | 47.4  | Bashir <i>et al.</i> [21]       |
|    |                               | Mersing                                               | 4.87  | 0.016 | 34.1  | Bashir <i>et al.</i> [21]       |
|    |                               | Blanakan River Estuary, Indonesia                     | 10.76 | 0.036 | 75.3  | Takarina <i>et al.</i> [22]     |
|    |                               | Daya Bay's Fishery Resource Reserve, South China Sea  | 7.37  | 0.025 | 51.6  | Gu <i>et al.</i> [24]           |
|    |                               | Kuala Tanjung coast, North Sumatra                    | 11.66 | 0.039 | 81.6  | Simanjuntak <i>et al.</i> [16]  |
| 9  | <i>Pampus chinensis</i>       | Setiu                                                 | 9.99  | 0.033 | 69.9  | This study                      |
|    |                               | Karachi Fish Harbour, Pakistan                        | 2.69  | 0.009 | 18.9  | Ahmed and Bat [36]              |
|    |                               | Kalimati fish market (Kathmandu)                      | 7.78  | 0.026 | 54.5  | Paudel <i>et al.</i> [43]       |
|    |                               | Cox's Bazar, Bangladesh                               | 21.05 | 0.070 | 147.4 | Rakib <i>et al.</i> [26]        |
|    |                               | South-Eastern Part of Bangladesh                      | 2.45  | 0.008 | 17.2  | Tasnim <i>et al.</i> [28]       |
| 10 | <i>Anodontostoma chacunda</i> | Setiu                                                 | 15.83 | 0.053 | 110.8 | This study                      |

|    |                                |                                                 |       |       |       |                                 |
|----|--------------------------------|-------------------------------------------------|-------|-------|-------|---------------------------------|
|    |                                | Lada Bay, Panimbang, Indonesia                  | 10.39 | 0.035 | 72.7  | Agusa <i>et al.</i> [9]         |
|    |                                | Bondet, Cirebon, Indonesia                      | 10.05 | 0.034 | 70.4  | Agusa <i>et al.</i> [9]         |
|    |                                | Mengabang Telipot River, Kuala Terengganu       | 1.85  | 0.006 | 13.0  | Kamaruzzaman <i>et al.</i> [29] |
|    |                                | Arabian Sea coasts of Pakistan                  | 20.85 | 0.069 | 145.9 | Ahmed <i>et al.</i> [30]        |
| 11 | <i>Chirocentrus dorab</i>      | Setiu                                           | 11.51 | 0.038 | 80.6  | This study                      |
|    |                                | Cochin coast, India                             | 2.43  | 0.008 | 17.0  | Nair <i>et al.</i> [12]         |
|    |                                | Palk Bay, Southeastern India                    | 11.05 | 0.037 | 77.4  | Arulkumar <i>et al.</i> [31]    |
|    |                                | Southwest coast of Peninsular Malaysia          | 1.23  | 0.004 | 8.6   | Kamaruzzaman <i>et al.</i> [42] |
|    |                                | West coast of Peninsular Malaysia               | 5.48  | 0.018 | 38.4  | Nurnadia <i>et al.</i> [8]      |
| 12 | <i>Rastrelliger kanagurta</i>  | Setiu                                           | 33.75 | 0.113 | 236.3 | This study                      |
|    |                                | Mersing                                         | 9.73  | 0.032 | 68.1  | Agusa <i>et al.</i> [4]         |
|    |                                | Lada Bay, Panimbang, Indonesia                  | 6.29  | 0.021 | 44.0  | Agusa <i>et al.</i> [9]         |
|    |                                | Song Khla, Thailand                             | 21.26 | 0.071 | 148.8 | Agusa <i>et al.</i> [9]         |
|    |                                | Ranong, Thailand                                | 8.85  | 0.029 | 61.9  | Agusa <i>et al.</i> [9]         |
|    |                                | Saint Martin Island, Bangladesh                 | 3.86  | 0.013 | 27.0  | Baki <i>et al.</i> [32]         |
|    |                                | Andaman Sea                                     | 9.82  | 0.033 | 68.8  | Kureishy <i>et al.</i> [1]      |
|    |                                | Marine fish Peninsular Malaysia                 | 14.65 | 0.049 | 102.5 | Wan Azmi <i>et al.</i> [3]      |
|    |                                | Pahang coastal waters                           | 10.06 | 0.034 | 70.5  | Kamaruzzaman <i>et al.</i> [7]  |
|    |                                | Cochin coast, India                             | 6.29  | 0.021 | 44.0  | Nair <i>et al.</i> [12]         |
|    |                                | Palk Bay, Southeastern India                    | 12.29 | 0.041 | 86.0  | Arulkumar <i>et al.</i> [31]    |
|    |                                | Langkawi Island                                 | 16.33 | 0.054 | 114.3 | Irwandi and Farida [34]         |
|    |                                | West coast of Peninsular Malaysia               | 7.48  | 0.025 | 52.4  | Nurnadia <i>et al.</i> [8]      |
|    |                                | Coastal waters off Kochi, India                 | 15.68 | 0.052 | 109.8 | Rejomon <i>et al.</i> [33]      |
|    |                                | Kunduchi fish market in Dar es Salaam, Tanzania | 43.61 | 0.145 | 305.3 | Mziray and Kimirei [35]         |
| 13 | <i>Scomberomorus commerson</i> | Setiu                                           | 18.41 | 0.061 | 128.9 | This study                      |
|    |                                | Koh Kong, Cambodia                              | 6.49  | 0.022 | 45.4  | Agusa <i>et al.</i> [9]         |
|    |                                | Marine fish Peninsular Malaysia                 | 7.56  | 0.025 | 53.0  | Wan Azmi <i>et al.</i> [3]      |
|    |                                | Langkawi Island                                 | 13.81 | 0.046 | 96.7  | Irwandi and Farida [34]         |
|    |                                | Coast of Karachi, Pakistan                      | 3.50  | 0.012 | 24.5  | Ahmed <i>et al.</i> [36]        |
|    |                                | Zhongsha (Macclesfield)                         |       |       |       |                                 |
|    |                                | Fishing Ground, South China Sea                 | 6.84  | 0.023 | 47.9  | Gu <i>et al.</i> [37]           |
| 14 | <i>Trichiurus lepturus</i>     | Setiu                                           | 8.57  | 0.029 | 60.0  | This study                      |
|    |                                | Miri                                            | 8.98  | 0.030 | 62.8  | Anandkumar <i>et al.</i> [13]   |
|    |                                | Kutubdia Island, The Bay of Bengal              | 9.69  | 0.032 | 67.8  | Rahman <i>et al.</i> [38]       |
|    |                                | Mumbai Harbor, India                            | 15.02 | 0.050 | 105.2 | Velusamy <i>et al.</i> [20]     |
| 15 | <i>Arius maculatus</i>         | Setiu                                           | 12.61 | 0.042 | 88.3  | This study                      |
|    |                                | Mumbai Harbor, India                            | 20.51 | 0.068 | 143.6 | Velusamy <i>et al.</i> [20]     |
| 16 | <i>Himantura walga</i>         | Setiu                                           | 9.52  | 0.032 | 66.6  | This study                      |
| 17 | <i>Nemipterus hexodon</i>      | Setiu                                           | 8.53  | 0.028 | 59.7  | This study                      |
| 18 | <i>Alectis indica</i>          | Setiu                                           | 9.45  | 0.031 | 66.1  | This study                      |
| 19 | <i>Lactarius lactarius</i>     | Setiu                                           | 11.05 | 0.037 | 77.3  | This study                      |

Note: PTWIs for a 62 kg adult is equivalent to 434 mg/week for Zn.

## References

1. Kureishy, T.W.; Sanzgiry, S.; Braganca, A. Some Heavy Metals in Fishes from the Andaman Sea. *Indian J. Mar. Sci.* **1981**, *10*, 303–307.
2. Ong, M.C.; Abd Aziz, N.; M Shazili, N.A.; Yunus, K. Selected Heavy Metals Content in Commercial Fishes at Different Season Landed at Fisheries Development Authority of Malaysia Complex (LKIM) Complex, Kuala Terengganu, Malaysia. *J. Sustain. Sci. Manag.* **2018**, *13*, 29–38.
3. Wan Azmi, W.N.F.; Nurul Izzah, A.; Wan Mahiyuddin, W.R. Heavy Metal Levels and Risk Assessment from Consumption of Marine Fish in Peninsular Malaysia. *J. Environ. Prot.* **2019**, *10*, 1450–1471, doi:10.4236/jep.2019.1011086.
4. Agusa, T.; Kunito, T.; Yasunaga, G.; Iwata, H.; Subramanian, A.; Ismail, A.; Tanabe, S. Concentrations of Trace Elements in Marine Fish and Its Risk Assessment in Malaysia. *Mar. Pollut. Bull.* **2005**, *51*, 896–911, doi:10.1016/j.marpolbul.2005.06.007.
5. Khalaf, M.; Al-Najjar, T.; Alawi, Dr.M.; A.Disi, A. Levels of Trace Metals in Three Fish Species Decapterus Macrellus, Decapterus Macrosomos and Decapterus Russellii of the Family Carangidae from the Gulf of Aqaba, Read Sea, Jordan. *Nat. Sci.* **2012**, *4*, 362–367, doi:10.4236/ns.2012.46050.
6. Praveena, S.; Lin, C.L.S. Assessment of Heavy Metal in Self-Caught Saltwater Fish from Port Dickson Coastal Water, Malaysia. *Sains Malays.* **2015**, *44*, 91–99, doi:10.17576/jsm-2015-4401-13.
7. Kamaruzzaman, Y.; Ong, M.C.; Rina, S.Z. Concentration of Zn, Cu and Pb in Some Selected Marine Fishes of the Pahang Coastal Waters, Malaysia. *Am. J. Appl. Sci.* **2010**, *7*, 309–314, doi:10.3844/ajassp.2010.309.314.
8. Nurnadia, A.A.; Azrina, A.; Amin, I.; Mohd Yunus, A.S.; Effendi Halmi, M. Mineral Contents of Selected Marine Fish and Shellfish from the West Coast of Peninsular Malaysia. *Int. Food Res. J.* **2013**, *20*, 431–437.
9. Agusa, T.; Kunito, T.; Sudaryanto, A.; Monirith, I.; Kan-Atireklap, S.; Iwata, H.; Ismail, A.; Sanguansin, J.; Muchtar, M.; Tana, T.S.; et al. Exposure Assessment for Trace Elements from Consumption of Marine Fish in Southeast Asia. *Environ. Pollut. Barking Essex 1987* **2007**, *145*, 766–777, doi:10.1016/j.envpol.2006.04.034.
10. Salam, M.A.; Dayal, S.R.; Siddiqua, S.A.; Muhib, M.I.; Bhowmik, S.; Kabir, M.M.; Rak, A.A.E.; Srzednicki, G. Risk Assessment of Heavy Metals in Marine Fish and Seafood from Kedah and Selangor Coastal Regions of Malaysia: A High-Risk Health Concern for Consumers. *Environ. Sci. Pollut. Res. Int.* **2021**, *28*, 55166–55175, doi:10.1007/s11356-021-14701-z.
11. Fathi, B.; Othman, M.; Mazlan, A.G.; Idris, G.; Arshad, A.; Amin, S.M.N.; Simon, D. Trace Metals in Muscle, Liver and Gill Tissues of Marine Fishes from Mersing, Eastern Coast of Peninsular Malaysia: Concentration and Assessment of Human Health Risk. *Asian J. Anim. Vet. Adv.* **2013**, *8*, 227–236, doi:10.3923/ajava.2013.227.236.
12. Nair, M.; Balachandran, K.K.; Sankaranarayanan, V.N.; Joseph, T. Heavy Metals in Fishes from Coastal Waters of Cochin, Southwest Coast of India. *Int. J. Mar. Sci.* **1997**, *26*, 98–100.
13. Anandkumar, R.N.; Prabakaran, K.; Chua, H.B.; Rajaram, D.R. Human Health Risk Assessment and Bioaccumulation of Trace Metals in Fish Species Collected from the Miri Coast, Sarawak, Borneo. *Mar. Pollut. Bull.* **2018**, *133*, 655–663, doi:10.1016/j.marpolbul.2018.06.033.
14. Agah, H. Ecological Risk Assessment of Heavy Metals in Sediment, Fish, and Human Hair from Chabahar Bay, Makoran, Iran. *Mar. Pollut. Bull.* **2021**, *169*, 112345, doi:10.1016/j.marpolbul.2021.112345.
15. Niri, A.S.; Sharifian, S.; Ahmadi, R. Assessment of Metal Accumulation in Two Fish Species (*Tenualosa ilisha* and *Otolithes ruber*), Captured from the North of Persian Gulf. *Bull. Environ. Contam. Toxicol.* **2015**, *94*, 71–76, doi:10.1007/s00128-014-1429-9.
16. Simanjuntak, C.; Djumanto, D.; Rahardjo, M.; Zahid, A. Assessment of Heavy Metals (Al, Zn, Cu, Cd, Pb and Hg) in Demersal Fishes of Kuala Tanjung Coast, North Sumatera. In Proceedings of the FAPERIKA-UNRI; Riau University: Indonesia, December 1 2012; pp. 178–196.

17. Raza, R.; Sayeed, S.A.; Siddiqi, R.; Naz, S. Trace Metal Contents in Selected Marine Fish Species of Northwest Coastal Area of Karachi, Pakistan. *J. Chem. Soc. Pak.* **2003**, *25*, 313–316.
18. Hosseini, M.; Nabavi, S.M.B.; Nabavi, S.N.; Pour, N.A. Heavy Metals (Cd, Co, Cu, Ni, Pb, Fe, and Hg) Content in Four Fish Commonly Consumed in Iran: Risk Assessment for the Consumers. *Environ. Monit. Assess.* **2015**, *187*, 237, doi:10.1007/s10661-015-4464-z.
19. Abadi, D.R.V.; Dobaradaran, S.; Nabipour, I.; Lamani, X.; Ravanipour, M.; Tahmasebi, R.; Nazmara, S. Comparative Investigation of Heavy Metal, Trace, and Macro Element Contents in Commercially Valuable Fish Species Harvested off from the Persian Gulf. *Environ. Sci. Pollut. Res. Int.* **2015**, *22*, 6670–6678, doi:10.1007/s11356-014-3852-1.
20. Velusamy, A.; Satheesh Kumar, P.; Ram, A.; Chinnadurai, S. Bioaccumulation of Heavy Metals in Commercially Important Marine Fishes from Mumbai Harbor, India. *Mar. Pollut. Bull.* **2014**, *81*, 218–224, doi:10.1016/j.marpolbul.2014.01.049.
21. Bashir, F.; Othman, M.; A.G., M.; M Rahim, S.; Das, S. Heavy Metal Concentration in Fishes from the Coastal Waters of Kapar and Mersing, Malaysia. *Turk. J. Fish. Aquat. Sci.* **2013**.
22. Takarina, N.D.; Purwiyanto, A.I.S.; Suteja, Y. Cadmium (Cd), Copper (Cu), and Zinc (Zn) Levels in Commercial and Non-Commercial Fishes in the Blanakan River Estuary, Indonesia: A Preliminary Study. *Mar. Pollut. Bull.* **2021**, *170*, 112607, doi:10.1016/j.marpolbul.2021.112607.
23. Abdolapur Monikh, F.; Safahieh, A.; Savari, A.; Ronagh, M.T.; Doraghi, A. The Relationship between Heavy Metal (Cd, Co, Cu, Ni and Pb) Levels and the Size of Benthic, Benthopelagic and Pelagic Fish Species, Persian Gulf. *Bull. Environ. Contam. Toxicol.* **2013**, *90*, 691–696, doi:10.1007/s00128-013-0986-7.
24. Gu, Y.-G.; Huang, H.-H.; Lin, Q. Concentrations and Human Health Implications of Heavy Metals in Wild Aquatic Organisms Captured from the Core Area of Daya Bay's Fishery Resource Reserve, South China Sea. *Environ. Toxicol. Pharmacol.* **2016**, *45*, 90–94, doi:10.1016/j.etap.2016.05.022.
25. Ahmed, Q.; Bat, L. Potential Risk of Some Heavy Metals in Pampus Chinensis (Euphrasen) Chinese Silver Pomfret Stromateidae Collected from Karachi Fish Harbour, Pakistan. *Int. J. Mar. Sci.* **2015**, *555*, 1–5, doi:10.5376/ijms.2015.05.0021.
26. Rakib, M.R.J.; Jolly, Y.N.; Enyoh, C.E.; Khandaker, M.U.; Hossain, M.B.; Akther, S.; Alsubaie, A.; Almalki, A.S.A.; Bradley, D.A. Levels and Health Risk Assessment of Heavy Metals in Dried Fish Consumed in Bangladesh. *Sci. Rep.* **2021**, *11*, 14642, doi:10.1038/s41598-021-93989-w.
27. Ahmed, A.S.S.; Sultana, S.; Habib, A.; Ullah, H.; Musa, N.; Hossain, M.B.; Rahman, M.M.; Sarker, M.S.I. Bioaccumulation of Heavy Metals in Some Commercially Important Fishes from a Tropical River Estuary Suggests Higher Potential Health Risk in Children than Adults. *PloS One* **2019**, *14*, e0219336, doi:10.1371/journal.pone.0219336.
28. Tasnim, K.T.; Akter, S.; Shueb, M.; Farha, W. Fatty Acids Composition and Heavy Metals in Marine Fish Samples from the South-Eastern Part of Bangladesh. *Org. Chem. Plus* **2020**, *1*, 46–51, doi:10.37256/ocp.122020457.
29. Kamaruzzaman, B.Y.; Ong, M.C.; Jalal, K.C.A. Levels of Copper, Zinc and Lead in Fishes of Mengabang Telipot River, Terengganu, Malaysia. *J. Biol. Sci.* **2008**, *8*, doi:10.3923/jbs.2008.1181.1186.
30. Ahmed, Q.; Bat, L.; Mohammad, Q. Bioaccumulation of Nine Heavy Metals in Some Tissues of Anodontostoma Chacunda (Hamilton, 1822) in the Arabian Sea Coasts of Pakistan. *Nat. Eng. Sci.* **2017**, *2*, 79–92, doi:10.28978/nesciences.349296.
31. Arulkumar, A.; Paramasivam, S.; Rajaram, R. Toxic Heavy Metals in Commercially Important Food Fishes Collected from Palk Bay, Southeastern India. *Mar. Pollut. Bull.* **2017**, *119*, 454–459, doi:10.1016/j.marpolbul.2017.03.045.
32. Baki, M.A.; Hossain, M.M.; Akter, J.; Quraishi, S.B.; Haque Shojib, M.F.; Atique Ullah, A.K.M.; Khan, M.F. Concentration of Heavy Metals in Seafood (Fishes, Shrimp, Lobster and Crabs) and Human Health Assessment in Saint Martin Island, Bangladesh. *Ecotoxicol. Environ. Saf.* **2018**, *159*, 153–163, doi:10.1016/j.ecoenv.2018.04.035.
33. Rejomon, G.; Nair, M.; Joseph, T. Trace Metal Dynamics in Fishes from the Southwest Coast of India. *Environ. Monit. Assess.* **2010**, *167*, 243–255, doi:10.1007/s10661-009-1046-y.

- 
34. Irwandi, J.; Farida, M. Mineral and Heavy Metal Contents of Marine Fin Fish in Langkawi Island, Malaysia. *Int. Food Res. J.* **2009**, *16*.
35. Mziray, P.; Kimirei, I. Bioaccumulation of Heavy Metals in Marine Fishes (*Siganus Sutor*, *Lethrinus Harak*, and *Rastrelliger Kanagurta*) from Dar Es Salaam Tanzania. *Reg. Stud. Mar. Sci.* **2016**, *7*, 72–80, doi:10.1016/j.rsma.2016.05.014.
36. Ahmed, Q.; Bat, L.; Yousuf, F.; Mohammad Ali, Q.; Nazim, K. Accumulation of Heavy Metals (Fe, Mn, Cu, Zn, Ni, Pb, Cd and Cr) in Tissues of Narrow-Barred Spanish Mackerel (Family-Scombridae) Fish Marketed by Karachi Fish Harbor. *Open Biol. Sci. J.* **2015**, *1*, 20–28, doi:10.2174/2352633501501010020.
37. Gu, Y.-G.; Lin, Q.; Wang, X.-H.; Du, F.-Y.; Yu, Z.-L.; Huang, H.-H. Heavy Metal Concentrations in Wild Fishes Captured from the South China Sea and Associated Health Risks. *Mar. Pollut. Bull.* **2015**, *96*, 508–512, doi:10.1016/j.marpolbul.2015.04.022.
38. Safiur Rahman, M.; Solaiman Hossain, Md.; Ahmed, Md.K.; Akther, S.; Jolly, Y.N.; Akhter, S.; Jamiul Kabir, M.; Choudhury, T.R. Assessment of Heavy Metals Contamination in Selected Tropical Marine Fish Species in Bangladesh and Their Impact on Human Health. *Environ. Nanotechnol. Monit. Manag.* **2019**, *11*, 100210, doi:10.1016/j.enmm.2019.100210.
39. Nurul Izzah, A.; Wan Rozita, W.M.; Tengku Rozaina, T.M.; Cheong, Y.L.; Siti Fatimah; Nasriyah, C.H.; Nor Aini, A.; Rafiza, S.; Lokman, H.S. Fish Consumption Pattern among Adults of Different Ethnicities in Peninsular Malaysia. *Food Nutr. Res.* **2016**, *60*, 32697, doi:10.3402/fnr.v60.32697.
40. Ahmed, Q.; Bat, L. Accumulations of Zn, Ni, B, Al, and Co in *Megalaspis Cordyla* from Fish Marketed by Karachi Fish Harbor of Pakistan. *Int. J. Fish. Aquat. Stud.* **2015**, *2*, 204–207.
41. Janadeleh, H.; Jahangiri, S. Risk Assessment and Heavy Metal Contamination in Fish (*Otolithes Ruber*) and Sediments in Persian Gulf. *J. Community Health Res.* **2016**, *5*, 169–181.
42. Kamaruzzaman, Y.; Rina, Z.; John, B.A.; Jalal, K.C.A. Heavy Metal Accumulation in Commercially Important Fishes of South West Malaysian Coast. *Res J Env. Sci* **2011**, *5*, 595–602, doi:10.3923/rjes.2011.595.602.
43. Paudel, P.; Pokhrel, B.; Kafle, B.; Gyawali, R. Analysis of Heavy Metals in Some Commercially Important Fishes of Kathmandu Valley, Nepal. *Int. Food Res. J.* **2016**, *23*, 1005–1011.
